# Supplementary material for: A genome-wide scan for candidate lethal variants in Thoroughbred horses
Source: PubMed Central journal article supplement (PMC7403398; doi:10.1038/s41598-020-68946-8), 2020-08-04
Supplement: 41598_2020_68946_MOESM1_ESM.pdf [file 41598_2020_68946_MOESM1_ESM.pdf]

## **A genome-wide scan for candidate lethal variants in Thoroughbred horses.**

### **Supplementary Information**

Evelyn T. Todd<sup>1\*</sup>, Peter C. Thomson<sup>1</sup>, Natasha A. Hamilton<sup>2</sup>, Rachel A. Ang<sup>1</sup>, Gabriella Lindgren<sup>3,4</sup>, Åsa Viklund<sup>3</sup>, Susanne Eriksson<sup>3</sup>, Sofia Mikko<sup>3</sup>, Eric Strand<sup>5</sup> and Brandon D. Velie<sup>1</sup>.

<sup>1</sup> School of Life and Environmental Sciences, The University of Sydney, NSW 2006, Australia.

<sup>2</sup> Racing Australia Equine Genetics Research Centre, Racing Australia, NSW 2000, Australia.

<sup>3</sup> Department of Animal Breeding and Genetics, Swedish University of Agricultural Sciences, Uppsala, Sweden.

<sup>4</sup> Livestock Genetics, Department of Biosystems, KU Leuven, Leuven, Belgium.

<sup>5</sup> Department of Companion Animal Clinical Sciences, Faculty of Veterinary Medicine, Norwegian University of Life Sciences, Oslo, Norway.

\*Correspondence and requests for materials should be addressed to Evelyn T. Todd (email:

evelyn.todd@sydney.edu.au)

**Table S1:** Variant frequencies of SNPs 6:38278097 and 6:38278874 for mixed domestic horse from Petersen et al., 2013(1). The total number of individuals in this dataset is 582.

| Breed                  | Sample Size | 6.38278097 |    |    | 6.38278874 |    |    |
|------------------------|-------------|------------|----|----|------------|----|----|
|                        |             | GG         | AG | AA | CC         | AC | AA |
| Akhal Teke             | 19          | 0          | 0  | 19 | 0          | 0  | 19 |
| Andalusian             | 18          | 0          | 2  | 16 | 0          | 2  | 16 |
| Arabian                | 19          | 0          | 1  | 18 | 0          | 1  | 18 |
| Belgian                | 19          | 0          | 4  | 15 | 0          | 4  | 15 |
| Caspian                | 16          | 0          | 0  | 16 | 0          | 0  | 16 |
| Clyde                  | 24          | 0          | 0  | 24 | 0          | 0  | 24 |
| Exmoor                 | 19          | 0          | 0  | 19 | 0          | 0  | 19 |
| Fell                   | 19          | 0          | 0  | 19 | 0          | 0  | 19 |
| Finn                   | 18          | 0          | 0  | 18 | 0          | 0  | 18 |
| Fjord                  | 19          | 0          | 0  | 19 | 0          | 0  | 19 |
| Frenches-Montagnes     | 19          | 0          | 2  | 17 | 0          | 2  | 17 |
| French Trotter         | 17          | 0          | 8  | 9  | 0          | 8  | 9  |
| Hanovarian             | 15          | 0          | 1  | 14 | 0          | 1  | 14 |
| Icelandic              | 19          | 0          | 3  | 16 | 0          | 3  | 16 |
| Mini                   | 18          | 0          | 2  | 16 | 0          | 2  | 16 |
| Mongolian              | 19          | 0          | 3  | 16 | 0          | 3  | 16 |
| Morgan                 | 19          | 0          | 5  | 14 | 0          | 5  | 14 |
| New Forest Pony        | 14          | 0          | 7  | 7  | 0          | 7  | 7  |
| Paint                  | 15          | 0          | 1  | 14 | 0          | 1  | 14 |
| Puerto Rican Paso Fino | 19          | 0          | 8  | 11 | 0          | 8  | 11 |
| Mangalarga Paulista    | 19          | 0          | 5  | 14 | 0          | 5  | 14 |
| Percheron              | 19          | 0          | 0  | 19 | 0          | 0  | 19 |
| Peruvian Paso          | 19          | 0          | 2  | 17 | 0          | 2  | 17 |
| Quarter Horse          | 19          | 0          | 12 | 7  | 0          | 12 | 7  |
| Saddlebred             | 19          | 0          | 2  | 17 | 0          | 2  | 17 |
| Shetland               | 19          | 0          | 2  | 17 | 0          | 2  | 17 |
| Shire                  | 19          | 0          | 2  | 17 | 0          | 2  | 17 |
| Standardbred           | 19          | 0          | 3  | 16 | 0          | 3  | 16 |
| North Swedish Horse    | 18          | 0          | 0  | 18 | 0          | 0  | 18 |
| Swiss Warmblood        | 14          | 0          | 1  | 13 | 0          | 1  | 13 |
| Thoroughbred           | 19          | 0          | 5  | 14 | 0          | 5  | 14 |
| Tuva                   | 15          | 0          | 4  | 11 | 0          | 4  | 11 |

**Table S2:** Variant frequencies of SNPs 6:38278097 and 6:38278874 in different populations of Quarter Horses (n=137). Data from Petersen et al. (2014)(2)

| Breed                     | 6:38278097      |    |    |                             | 6:38278874      |    |    |                             |
|---------------------------|-----------------|----|----|-----------------------------|-----------------|----|----|-----------------------------|
|                           | SNP frequencies |    |    | Proportion of heterozygotes | SNP frequencies |    |    | Proportion of heterozygotes |
|                           | GG              | AG | AA |                             | CC              | AC | AA |                             |
| <b>Reining (n=23)</b>     | 0               | 19 | 4  | 0.826087                    | 0               | 19 | 4  | 0.826087                    |
| <b>Pleasure (n=23)</b>    | 0               | 16 | 7  | 0.695652                    | 0               | 16 | 7  | 0.695652                    |
| <b>Halter (n=23)</b>      | 0               | 11 | 12 | 0.478261                    | 0               | 11 | 12 | 0.478261                    |
| <b>Working Cow (n=24)</b> | 0               | 21 | 3  | 0.875                       | 0               | 21 | 3  | 0.875                       |
| <b>Racing (n=23)</b>      | 0               | 13 | 10 | 0.565217                    | 0               | 13 | 10 | 0.565217                    |
| <b>Cutting (n=21)</b>     | 0               | 17 | 4  | 0.809524                    | 0               | 17 | 4  | 0.809524                    |
| <b>Total (n=137)</b>      | 0               | 97 | 40 | 0.708029                    | 0               | 97 | 40 | 0.708029                    |

**Table S3:** Allele frequencies of shortlisted variants in high linkage equilibrium with the two SNPs of interest (of 6:38278097 and 6:38278874). Variants were identified from whole-genome sequence data for 90 domestic horses of mixed breeds.

| Variant    | Minor Allele (B) | Major Allele (A) | B/B | A/B | A/A | $r^2$ | $D'$ | Distance from 6:38278097-6:38278874 | Annotation               |
|------------|------------------|------------------|-----|-----|-----|-------|------|-------------------------------------|--------------------------|
| 6:38223012 | A                | AT               | 2   | 11  | 23  | 0.83  | 1    | 55085                               | Intronic Variant LY49F   |
| 6:38264682 | T                | C                | 1   | 16  | 51  | 0.81  | 1    | 13415                               | Intronic Variant LY49F   |
| 6:38265144 | C                | T                | 1   | 13  | 46  | 0.85  | 0.92 | 12953                               | Intronic Variant LY49F   |
| 6:38273491 | G                | A                | 0   | 18  | 50  | 0.87  | 1    | 4606                                | Intronic Variant LY49F   |
| 6:38273498 | T                | C                | 0   | 18  | 49  | 0.87  | 1    | 4599                                | Intronic Variant LY49F   |
| 6:38273500 | T                | C                | 0   | 18  | 50  | 0.87  | 1    | 4597                                | Intronic Variant LY49F   |
| 6:38273759 | T                | C                | 0   | 15  | 52  | 0.93  | 1    | 4338                                | Intronic Variant LY49F   |
| 6:38274367 | A                | C                | 0   | 16  | 56  | 1     | 1    | 3730                                | Intronic Variant LY49F   |
| 6:38274942 | C                | T                | 0   | 14  | 44  | 1     | 1    | 3155                                | Intronic Variant LY49F   |
| 6:38276456 | C                | T                | 0   | 15  | 46  | 1     | 1    | 1641                                | Intronic Variant LY49F   |
| 6:38276742 | T                | A                | 0   | 11  | 53  | 0.83  | 1    | 1355                                | 3'UTR variant LY49B      |
| 6:38276955 | A                | G                | 0   | 15  | 54  | 1     | 1    | 1142                                | 3'UTR variant LY49B      |
| 6:38278097 | G                | A                | 0   | 16  | 56  | 1     | 1    | 0                                   | Intronic Variant LY49B   |
| 6:38278874 | C                | A                | 0   | 15  | 54  | 0.93  | 1    | 0                                   | Intronic Variant LY49B   |
| 6:38281733 | A                | AG               | 0   | 16  | 51  | 1     | 1    | 2859                                | Intronic Variant LY49B   |
| 6:38282610 | A                | G                | 0   | 16  | 47  | 1     | 1    | 3736                                | Missense variant LY49B   |
| 6:38284541 | C                | T                | 0   | 16  | 51  | 0.93  | 1    | 5667                                | Synonymous variant LY49B |
| 6:38285848 | A                | G                | 0   | 14  | 53  | 0.85  | 0.92 | 6974                                | Intronic Variant LY49B   |
| 6:38290614 | T                | A                | 1   | 13  | 49  | 0.85  | 0.92 | 11740                               | Intergenic variant       |
| 6:38292923 | T                | A                | 1   | 14  | 55  | 0.86  | 0.93 | 14049                               | Intergenic variant       |
| 6:38294589 | T                | C                | 1   | 13  | 51  | 0.85  | 0.92 | 15715                               | Intergenic variant       |
| 6:38296564 | T                | C                | 1   | 13  | 53  | 0.85  | 0.92 | 17690                               | Intergenic variant       |

|            |           |                     |   |    |    |      |      |        |                            |
|------------|-----------|---------------------|---|----|----|------|------|--------|----------------------------|
| 6:38297140 | A         | G                   | 1 | 14 | 42 | 0.86 | 0.93 | 18266  | Intronic Variant<br>MAGOHB |
| 6:38297149 | A         | C                   | 1 | 14 | 42 | 0.86 | 0.93 | 18275  | Intronic Variant<br>MAGOHB |
| 6:38304295 | T         | A                   | 1 | 11 | 43 | 0.83 | 0.91 | 25421  | Intronic Variant<br>MAGOHB |
| 6:38319283 | *         | A                   | 0 | 12 | 27 | 0.81 | 0.90 | 40409  | Intergenic variant         |
| 6:38334772 | T         | A                   | 0 | 12 | 47 | 0.82 | 0.91 | 55898  | Intergenic variant         |
| 6:38341477 | A         | G                   | 0 | 16 | 48 | 0.86 | 0.93 | 62603  | Intergenic variant         |
| 6:38341607 | A         | G                   | 0 | 15 | 58 | 0.86 | 0.92 | 62733  | Intergenic variant         |
| 6:38345686 | A         | G                   | 0 | 16 | 58 | 0.86 | 0.93 | 66812  | Intergenic variant         |
| 6:38349116 | C         | G                   | 0 | 9  | 12 | 0.86 | 1    | 70242  | Intronic Variant<br>LY49C  |
| 6:38349743 | A         | T                   | 1 | 13 | 48 | 0.85 | 1    | 70869  | Intronic Variant<br>LY49C  |
| 6:38351619 | C         | G                   | 1 | 15 | 57 | 0.80 | 0.93 | 72745  | Intronic Variant<br>LY49C  |
| 6:38352677 | G         | A                   | 1 | 9  | 20 | 0.89 | 1    | 73803  | Intronic Variant<br>LY49C  |
| 6:38353265 | A         | G                   | 1 | 13 | 51 | 0.85 | 1    | 74391  | Intronic Variant<br>LY49C  |
| 6:38354110 | A         | AGTTT<br>AGTTT<br>C | 0 | 16 | 59 | 0.86 | 0.93 | 75236  | Intronic Variant<br>LY49C  |
| 6:38358475 | AATA<br>T | AAT                 | 1 | 11 | 38 | 0.83 | 1    | 79601  | Intergenic variant         |
| 6:38360920 | A         | T                   | 1 | 15 | 47 | 0.87 | 1    | 82046  | Intergenic variant         |
| 6:38399815 | A         | C                   | 0 | 16 | 40 | 0.86 | 0.93 | 120941 | Intergenic variant         |
| 6:38441535 | G         | C                   | 1 | 15 | 52 | 0.80 | 0.93 | 162661 | Intronic Variant<br>LY49E  |

**Table S4:** Intensity values from microarray data of chorion and chorionic girdle equine embryonic tissue samples. Data from Read et al. (2018)(3).

| <b>Tissue</b>    | <b>Day of development</b> | <b>Intensity value</b> |
|------------------|---------------------------|------------------------|
| Chorionic Girdle | 27                        | 6.602977               |
| Chorionic Girdle | 27                        | 6.589985               |
| Chorionic Girdle | 27                        | 6.62416                |
| Chorionic Girdle | 27                        | 6.546489               |
| Chorionic Girdle | 30                        | 6.611029               |
| Chorionic Girdle | 30                        | 6.639321               |
| Chorionic Girdle | 30                        | 6.656763               |
| Chorionic Girdle | 30                        | 6.633977               |
| Chorionic Girdle | 30                        | 6.561605               |
| Chorionic Girdle | 31                        | 6.619057               |
| Chorionic Girdle | 31                        | 6.637935               |
| Chorionic Girdle | 31                        | 6.651646               |
| Chorionic Girdle | 31                        | 6.607523               |
| Chorionic Girdle | 31                        | 6.585455               |
| Chorionic Girdle | 34                        | 6.568278               |
| Chorionic Girdle | 34                        | 6.657548               |
| Chorionic Girdle | 34                        | 6.624379               |
| Chorionic Girdle | 34                        | 6.656019               |
| Chorionic Girdle | 34                        | 6.659633               |
| Chorion          | 27                        | 6.620722               |
| Chorion          | 27                        | 6.558723               |
| Chorion          | 27                        | 6.672482               |
| Chorion          | 27                        | 6.570658               |
| Chorion          | 30                        | 6.57291                |
| Chorion          | 30                        | 6.602505               |
| Chorion          | 30                        | 6.55263                |
| Chorion          | 30                        | 6.58852                |
| Chorion          | 30                        | 6.638503               |
| Chorion          | 31                        | 6.582505               |
| Chorion          | 31                        | 6.587206               |

|         |    |          |
|---------|----|----------|
| Chorion | 31 | 6.639011 |
| Chorion | 31 | 6.616271 |
| Chorion | 31 | 6.539944 |
| Chorion | 34 | 6.630667 |
| Chorion | 34 | 6.642043 |
| Chorion | 34 | 6.569519 |
| Chorion | 34 | 6.624507 |
| Chorion | 34 | 6.588266 |

**Table S5:** Publicly available whole genome sequence data for domestic horses used in variant calling analysis. The study accession and sample accession relate to the fields under which the sample is listed on The European Nucleotide Archive.

| <b>Sample</b> | <b>Breed</b>                         | <b>Study accession</b> |
|---------------|--------------------------------------|------------------------|
| ERR1527947    | Holsteiner                           | PRJEB14779             |
| ERR1527948    | Akhal-Teke                           | PRJEB14779             |
| ERR1527949    | Akhal-Teke                           | PRJEB14779             |
| ERR1527950    | Akhal-Teke                           | PRJEB14779             |
| ERR1527951    | Arabian                              | PRJEB14779             |
| ERR1527952    | Franches-Montagnes                   | PRJEB14779             |
| ERR1527953    | Franches-Montagnes                   | PRJEB14779             |
| ERR1527954    | Franches-Montagnes                   | PRJEB14779             |
| ERR1527955    | Franches-Montagnes                   | PRJEB14779             |
| ERR1527956    | Franches-Montagnes                   | PRJEB14779             |
| ERR1527957    | Franches-Montagnes                   | PRJEB14779             |
| ERR1527958    | Franches-Montagnes                   | PRJEB14779             |
| ERR1527959    | Franches-Montagnes                   | PRJEB14779             |
| ERR1527960    | Franches-Montagnes                   | PRJEB14779             |
| ERR1527961    | Franches-Montagnes                   | PRJEB14779             |
| ERR1527962    | Franches-Montagnes                   | PRJEB14779             |
| ERR1527963    | Franches-Montagnes                   | PRJEB14779             |
| ERR1527964    | Franches-Montagnes                   | PRJEB14779             |
| ERR1527965    | Franches-Montagnes                   | PRJEB14779             |
| ERR1527966    | Haflinger                            | PRJEB14779             |
| ERR1527967    | Koninklijk Warmbloed Paard Nederland | PRJEB14779             |
| ERR1527968    | Quarter Horse                        | PRJEB14779             |
| ERR1527969    | Quarter Horse                        | PRJEB14779             |
| ERR1527970    | Quarter Horse                        | PRJEB14779             |
| ERR1527971    | Franches-Montagnes                   | PRJEB14779             |
| ERR1527972    | Swiss Warmblood                      | PRJEB14779             |
| ERR1545178    | Badenwürttembergisches Warmblut      | PRJEB14779             |
| ERR1545179    | Bayrisches Warmblut                  | PRJEB14779             |
| ERR1545180    | Hannoveraner                         | PRJEB14779             |
| ERR1545181    | Holsteiner                           | PRJEB14779             |
| ERR1545182    | Holsteiner                           | PRJEB14779             |
| ERR1545183    | Oldenburger                          | PRJEB14779             |
| ERR1545184    | Oldenburger                          | PRJEB14779             |



|            |                      |             |
|------------|----------------------|-------------|
| ERR1545185 | Trakehner            | PRJEB14779  |
| ERR1545186 | Westfale             | PRJEB14779  |
| ERR1545187 | Westfale             | PRJEB14779  |
| ERR1545188 | Swiss Warmblood      | PRJEB14779  |
| ERR1545189 | Swiss Warmblood      | PRJEB14779  |
| ERR1545190 | Holsteiner           | PRJEB14779  |
| ERR1735862 | Thoroughbred         | PRJEB14779  |
| ERR2179540 | Franches-Montagnes   | PRJEB14779  |
| ERR2179541 | Franches-Montagnes   | PRJEB14779  |
| ERR2179542 | German Riding Pony   | PRJEB14779  |
| ERR2179543 | Welsh Pony           | PRJEB14779  |
| ERR2179544 | Polish Warmblood     | PRJEB14779  |
| ERR2179545 | German Riding Pony   | PRJEB14779  |
| ERR2179546 | Morgan Horse         | PRJEB14779  |
| ERR2179547 | Holsteiner           | PRJEB14779  |
| ERR2179548 | Oldenburger          | PRJEB14779  |
| ERR2179549 | Hannoveraner         | PRJEB14779  |
| ERR2179550 | Welsh Pony           | PRJEB14779  |
| ERR2179551 | Arabian              | PRJEB14779  |
| ERR2179552 | Noriker              | PRJEB14779  |
| ERR2179553 | Haflinger            | PRJEB14779  |
| ERR2179554 | Haflinger            | PRJEB14779  |
| ERR2179555 | Haflinger            | PRJEB14779  |
| ERR2179556 | Swiss Warmblood      | PRJEB14779  |
| ERR2203766 | Trakehner            | PRJEB14779  |
| ERR2731055 | American Paint Horse | PRJEB14779  |
| ERR2731056 | Shetland Pony        | PRJEB14779  |
| ERR2731057 | Icelandic            | PRJEB14779  |
| ERR2731058 | Holsteiner           | PRJEB14779  |
| ERR2731059 | Holsteiner           | PRJEB14779  |
| ERR2731060 | Holsteiner           | PRJEB14779  |
| ERR2731061 | Akhal-Teke           | PRJEB14779  |
| ERR3317814 | Deutsches Reitpony   | PRJEB14779  |
| ERR3628171 | Traber               | PRJEB14779  |
| ERR3628172 | Traber               | PRJEB14779  |
| ERR3628173 | Traber               | PRJEB14779  |
| ERR3628174 | Franches-Montagnes   | PRJEB14779  |
| SRR505867  | Thoroughbred         | PRJNA168142 |
| SRR515202  | Thoroughbred         | PRJNA168142 |
| SRR515203  | Thoroughbred         | PRJNA168142 |

|           |              |             |
|-----------|--------------|-------------|
| SRR515204 | Thoroughbred | PRJNA168142 |
| SRR515205 | Thoroughbred | PRJNA168142 |
| SRR515206 | Thoroughbred | PRJNA168142 |
| SRR515208 | Thoroughbred | PRJNA168142 |
| SRR515209 | Thoroughbred | PRJNA168142 |
| SRR515211 | Thoroughbred | PRJNA168142 |
| SRR515212 | Thoroughbred | PRJNA168142 |
| SRR515213 | Thoroughbred | PRJNA168142 |
| SRR515214 | Thoroughbred | PRJNA168142 |
| SRR515215 | Thoroughbred | PRJNA168142 |
| SRR515216 | Thoroughbred | PRJNA168142 |
| SRR515217 | Thoroughbred | PRJNA168142 |
| SRR515218 | Thoroughbred | PRJNA168142 |
| SRR641364 | Thoroughbred | PRJNA184688 |
| SRR641365 | Thoroughbred | PRJNA184688 |
| SRR641366 | Thoroughbred | PRJNA184688 |
| SRR641367 | Thoroughbred | PRJNA184688 |

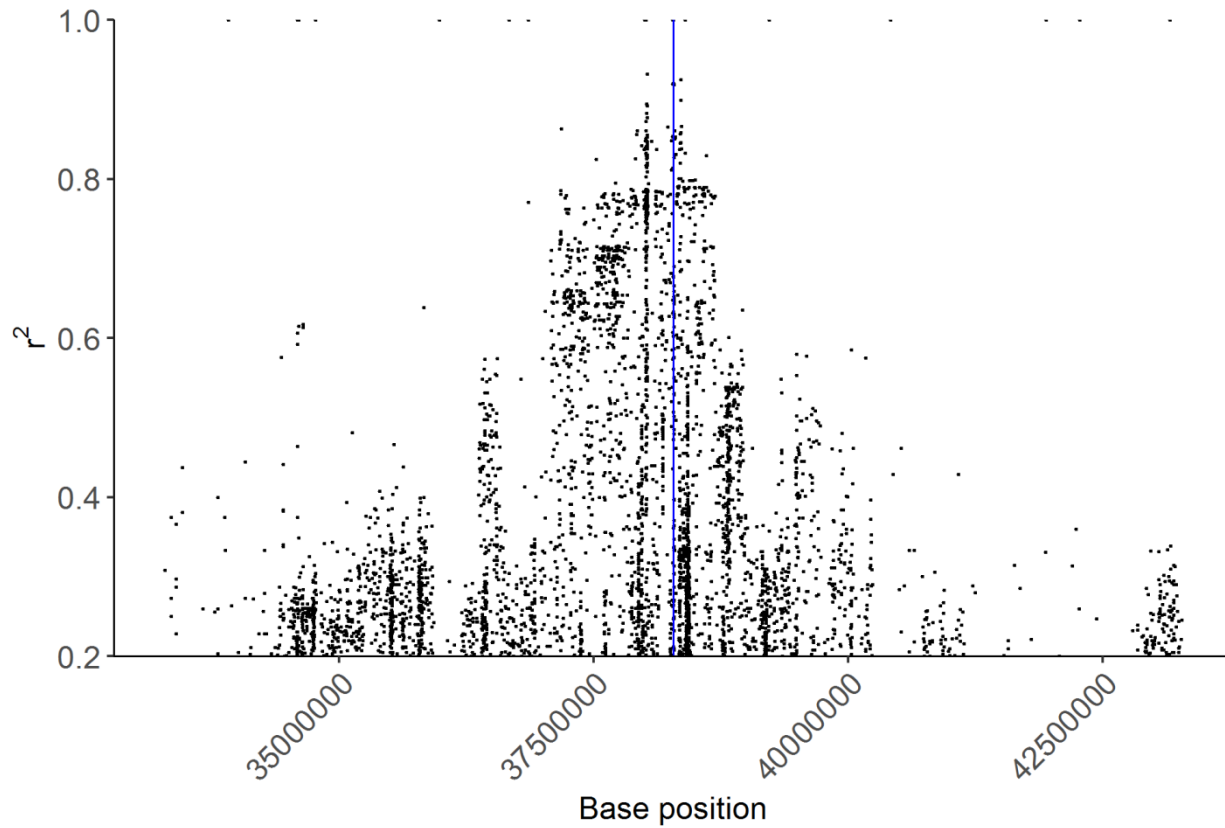

**Figure S1:** Linkage disequilibrium patterns relative to the markers 6.38278097 and 6.38278874.

The positions of 6.38278097 and 6.38278874 are indicated with the blue line. The region spanning 5Mb on either side of the 6.38278097 and 6.38278874 was included in this plot.

Variants were called from whole-genome sequence data of 90 horses.

## References

1. Petersen JL, Mickelson JR, Cothran EG, Andersson LS, Axelsson J, Bailey E, et al. Genetic diversity in the modern horse illustrated from genome-wide SNP data. PLOS ONE. 2013;8(1):e54997.
2. Petersen JL, Mickelson JR, Cleary KD, McCue ME. The American Quarter Horse: population structure and relationship to the Thoroughbred. J Hered. 2014;105(2):148-62.
3. Read JE, Cabrera-Sharp V, Offord V, Mirczuk SM, Allen SP, Fowkes RC, et al. Dynamic changes in gene expression and signalling during trophoblast development in the horse. Reproduction. 2018;156(4).
